# Supplementary material
Source: Research Square preprint supplement (doi:10.21203/rs.3.rs-9068763/v1)

# Informed consent


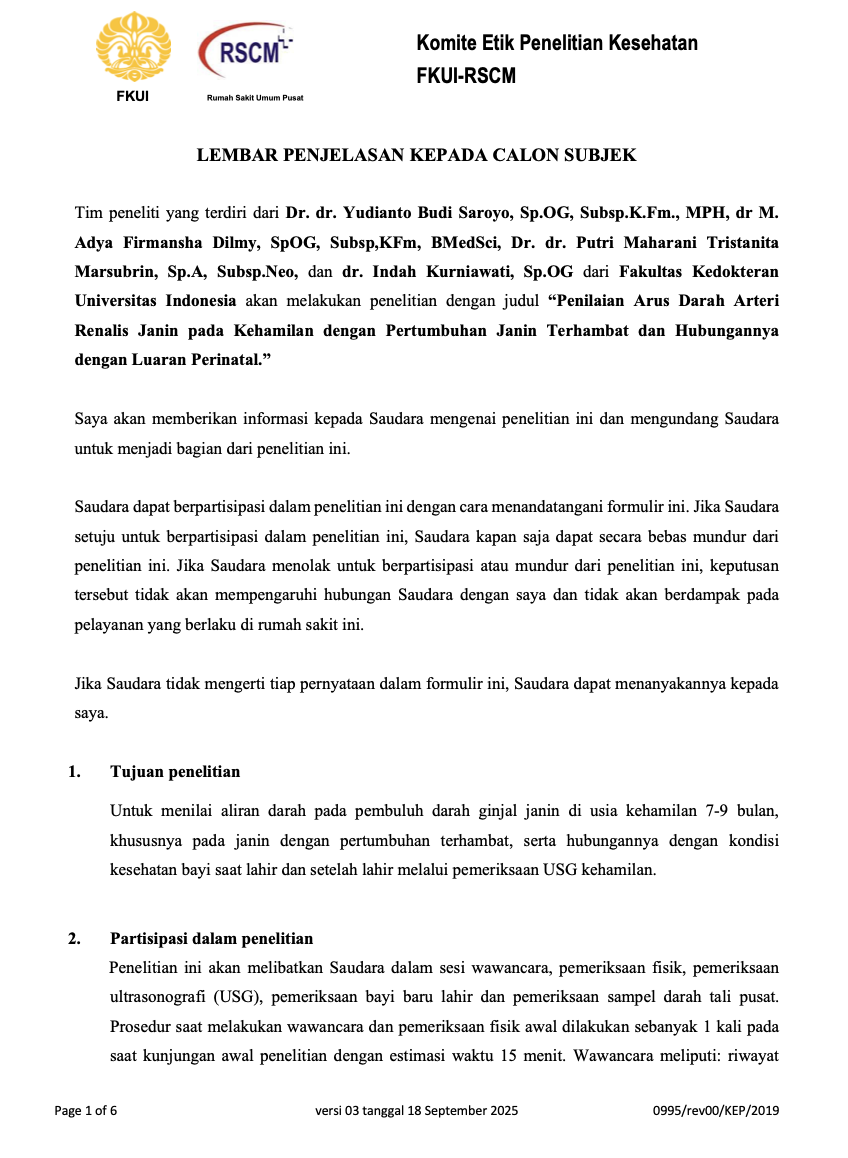


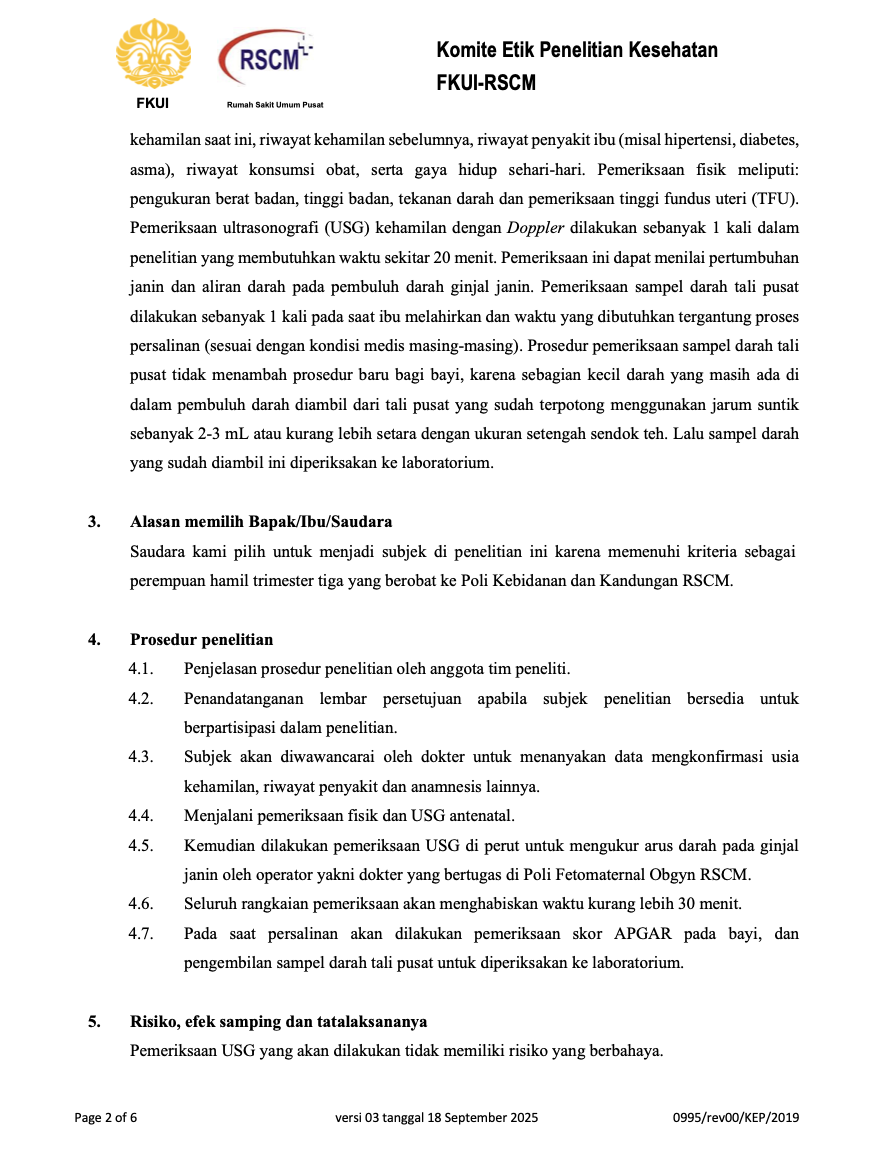


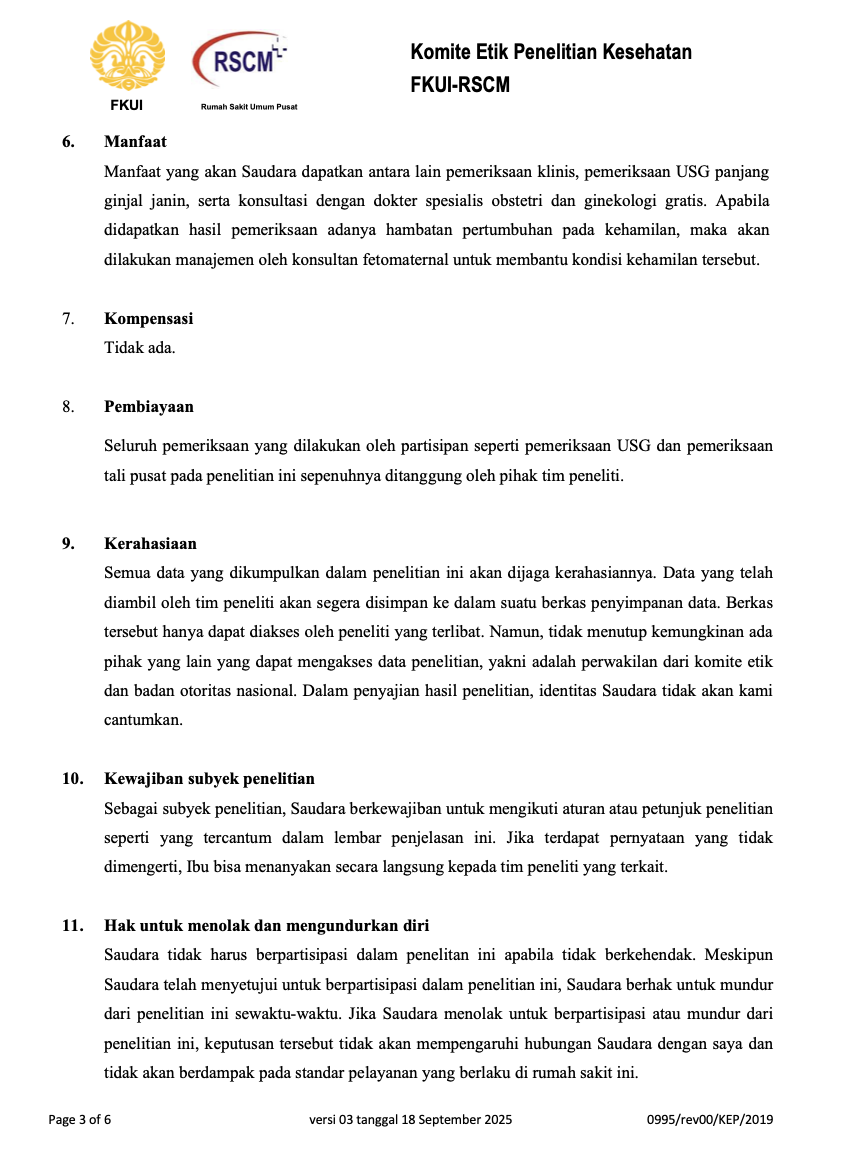


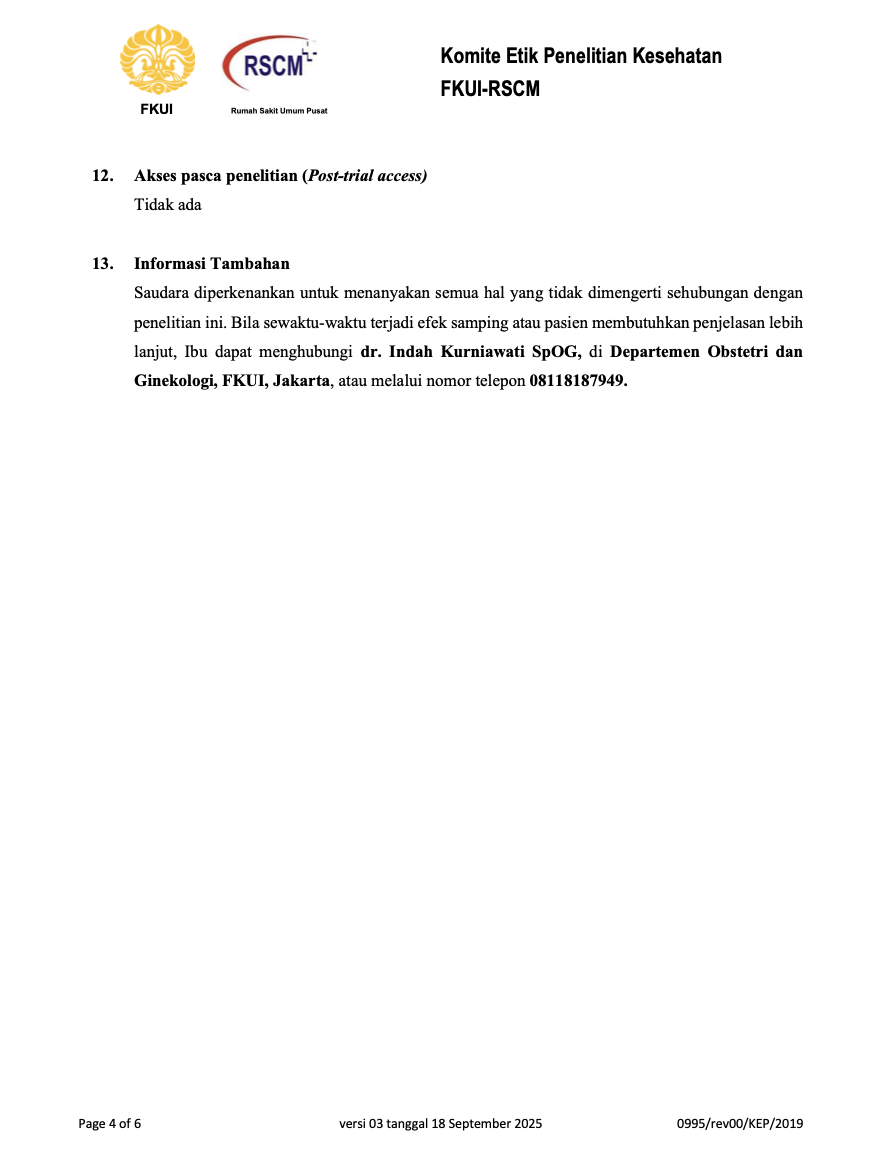


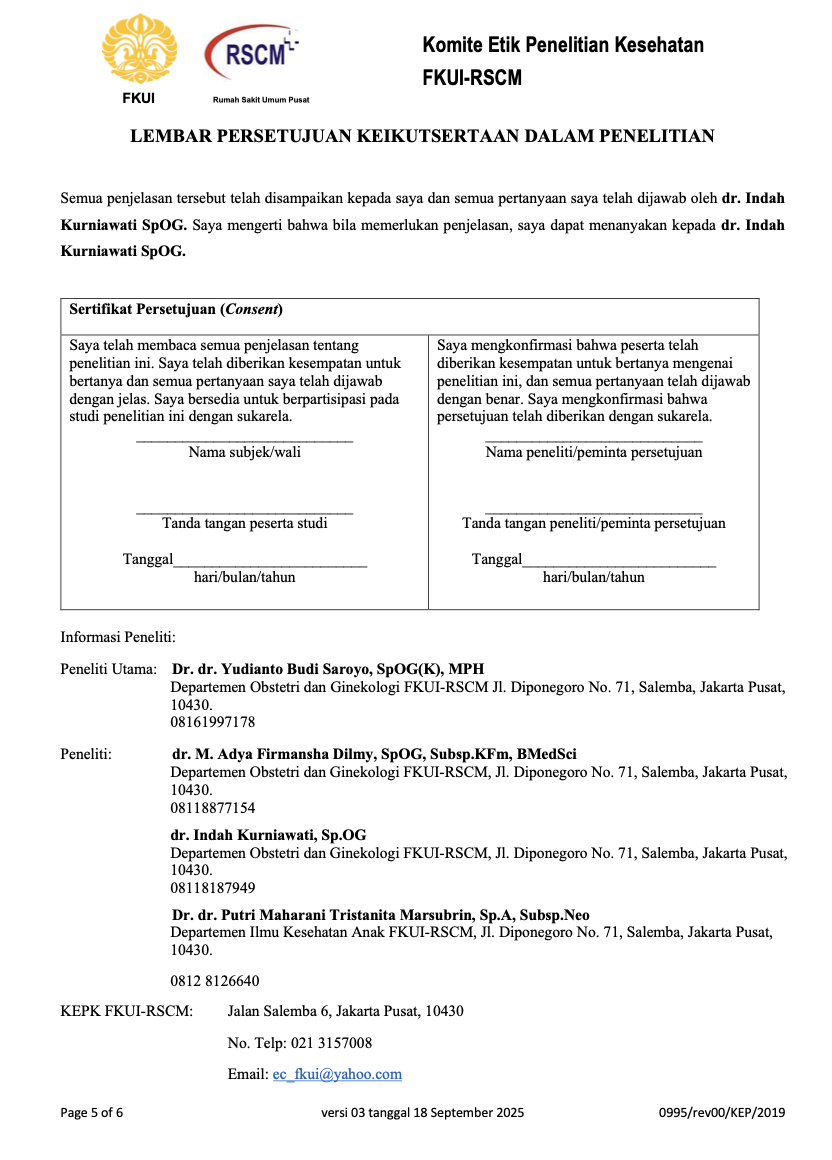


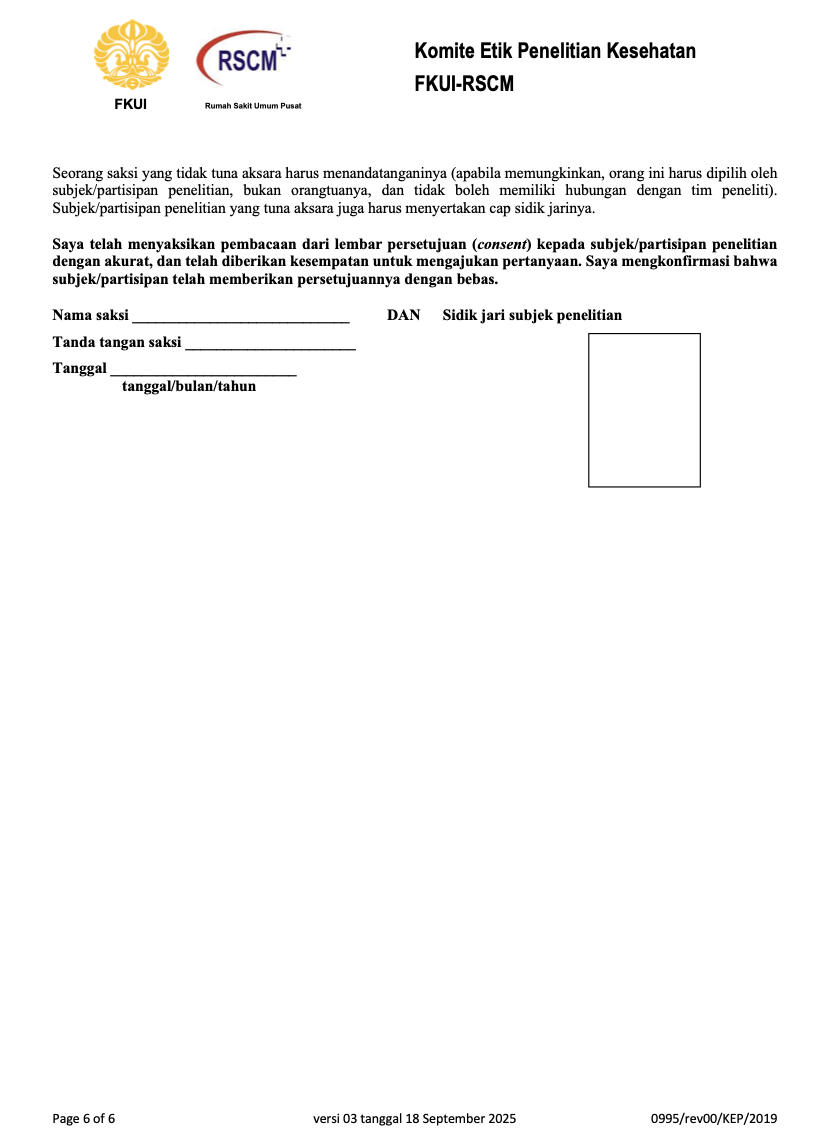

Supplement: Supplementary file 1 [file 03766cd4d9c19c79306fe4f4.docx]
